# Supplementary material for: Placebo-Controlled Trial of Daily Oral Cannabidiol as Adjunctive Treatment for Cats with Chronic Gingivostomatitis
Source: MDPI journal article supplement (doi:10.3390/ani13172716), 2023-08-26
Supplement: s1 [file s1]

## Stomatitis Disease Activity Index (SDAI) Score

### Owner Evaluation

|                          |                                                                                                                                                                                                                                                                   |
|--------------------------|-------------------------------------------------------------------------------------------------------------------------------------------------------------------------------------------------------------------------------------------------------------------|
| <b>Appetite</b>          | 3 = eats only pureed food, or only when hand fed<br>2 = eats wet food; cannot eat dry food<br>1 = eating wet and dry food, but less than normal amount<br>0 = eating normally                                                                                     |
| <b>Activity Level</b>    | 3 = no interest in people or other pets, spends most of time sleeping<br>2 = low activity level, but will play occasionally when engaged by people or other pets<br>1 = plays spontaneously, but not frequently<br>0 = normal activity level (playful and active) |
| <b>Grooming Behavior</b> | 3 = will not groom<br>2 = grooms occasionally but not at 'pre-illness' level<br>1 = grooming excessively<br>0 = grooming normally                                                                                                                                 |
| <b>Perceived Comfort</b> | On a scale of 0-3, with 0 being most comfortable and 3 being most painful, rank your cat's present comfort level: _____                                                                                                                                           |

### Scoring Criteria for Stomatitis Disease Activity Index (SDAI) Tabulation.

|                                                               |                                                                                            |
|---------------------------------------------------------------|--------------------------------------------------------------------------------------------|
| <b>Owner Evaluation*</b>                                      | The average of the scores above                                                            |
| <b>Weight (compared with most recent visit)</b>               | 0 = gain > 0.5kg<br>1 = gain > 0.25kg but < 0.5kg<br>2 = < 0.25 kg gain<br>3 = weight loss |
| <b>Inflammation (specified sites as graded by clinician)*</b> | 0 = none<br>1 = mild<br>2 = moderate<br>3 = severe                                         |

\* Intermediate value scores were accepted in these categories; As a result, the final SDAI scores may not be whole numbers

### Stomatitis Disease Activity Index (SDAI) Final Score Tabulation.

| STOMATITIS DISEASE ACTIVITY INDEX           | Day 0 | Day 15 |
|---------------------------------------------|-------|--------|
| Owner evaluation                            |       |        |
| Weight (compared to most recent visit)      |       |        |
| Maxillary buccal mucosal inflammation       |       |        |
| Mandibular buccal mucosal inflammation      |       |        |
| Maxillary attached gingival inflammation    |       |        |
| Mandibular attached gingival inflammation   |       |        |
| Inflammation lateral to palatoglossal folds |       |        |
| Molar salivary gland inflammation           |       |        |
| Oropharyngeal inflammation                  |       |        |
| Lingual and/or sublingual inflammation      |       |        |
| <b>TOTAL SCORE (max = 30)</b>               |       |        |
