# Supplementary material for: Placebo-Controlled Trial of Daily Oral Cannabidiol as Adjunctive Treatment for Cats with Chronic Gingivostomatitis
Source: MDPI journal article supplement (doi:10.3390/ani13172716), 2023-08-26
Supplement: s1 [file s1]

**Supplementary Table S1-** Statistical analysis of the physiological parameters.

| GLMM                                   | Coefficient | Std. Error | t value | p value | 95% CI for coefficient |         |
|----------------------------------------|-------------|------------|---------|---------|------------------------|---------|
| Fixed effects                          |             |            |         |         | 2.5%                   | 97.5%   |
| <b>Cardiac rate (bpm)</b>              |             |            |         |         |                        |         |
| Intercept                              | 159.727     | 8.995      | 17.758  |         | 142.098                | 177.357 |
| Group (CBD)                            | 24.727      | 12.725     | 1.943   | 0.052   | -0.213                 | 49.668  |
| Time (Day 15)                          | 7.182       | 5.418      | 1.695   | 0.090   | -1.438                 | 19.802  |
| Group:Time                             | -13.364     | 7.664      | -1.744  | 0.081   | -28.384                | 1.657   |
| <b>Respiratory rate (rpm)</b>          |             |            |         |         |                        |         |
| Intercept                              | 54.909      | 4.506      | 12.186  |         | 46.077                 | 63.741  |
| Group (CBD)                            | -1.818      | 6.373      | -0.285  | 0.775   | -14.308                | 10.672  |
| Time (Day 15)                          | 7.273       | 4.961      | 1.466   | 0.143   | -4.452                 | 16.997  |
| Group:Time                             | 13.091      | 7.017      | 1.866   | 0.062   | -0.662                 | 26.844  |
| <b>Systolic blood pressure (mmHg)</b>  |             |            |         |         |                        |         |
| Intercept                              | 164.727     | 6.994      | 23.553  |         | 151.019                | 178.435 |
| Group (CBD)                            | 7.043       | 9.687      | 0.727   | 0.467   | -11.944                | 26.029  |
| Time (Day 15)                          | -3.545      | 8.287      | -0.428  | 0.669   | -19.787                | 12.696  |
| Group:Time                             | -12.759     | 12.134     | -1.052  | 0.293   | -36.541                | 11.022  |
| <b>Diastolic blood pressure (mmHg)</b> |             |            |         |         |                        |         |
| Intercept                              | 109.364     | 5.355      | 20.422  |         | 94.868                 | 119.860 |
| Group (CBD)                            | 7.122       | 7.433      | 0.958   | 0.334   | -7.445                 | 121.690 |
| Time (Day 15)                          | -0.455      | 6.025      | -0.075  | 0.940   | -12.263                | 11.354  |
| Group:Time                             | -9.380      | 8.815      | -1.064  | 0.287   | -26.657                | 7.896   |

**Supplementary Table S2–** Statistical analysis of the weight.

| GLMM          | Coefficient | Std. Error | t value | p value | 95% CI for coefficient |       |
|---------------|-------------|------------|---------|---------|------------------------|-------|
| Fixed effects |             |            |         |         | 2.5%                   | 97.5% |
| Intercept     | 4.151       | 0.308      | 13.419  |         | 3.548                  | 4.754 |
| Group (CBD)   | 0.074       | 0.435      | 0.169   | 0.866   | -0.779                 | 0.927 |
| Time (Day 15) | -0.051      | 0.038      | -1.341  | 0.180   | -0.125                 | 0.024 |
| Group:Time    | 0.083       | 0.054      | 1.549   | 0.121   | -0.022                 | 0.188 |

**Supplementary Table S3 – Statistical analysis of the blood biochemistry.**

| GLMM                 | Coefficient | Std. Error | t value | p value | 95% CI for coefficient |        |
|----------------------|-------------|------------|---------|---------|------------------------|--------|
| Fixed effects        |             |            |         |         | 2.5%                   | 97.5%  |
| <b>Albumin</b>       |             |            |         |         |                        |        |
| <i>Intercept</i>     | 3.220       | 0.128      | 25.083  |         | 2.968                  | 3.472  |
| <b>Group (CBD)</b>   | 0.046       | 0.186      | 0.247   | 0.805   | -0.319                 | 0.411  |
| <b>Time (Day 15)</b> | -0.159      | 0.085      | -1.868  | 0.062   | -0.326                 | 0.008  |
| <b>Group:Time</b>    | 0.176       | 0.123      | 1.427   | 0.154   | -0.067                 | 0.418  |
| <b>ALT</b>           |             |            |         |         |                        |        |
| <i>Intercept</i>     | 26.664      | 3.339      | 7.987   |         | 20.120                 | 33.207 |
| <b>Group (CBD)</b>   | 7.576       | 4.838      | 1.566   | 0.117   | -1.906                 | 17.058 |
| <b>Time (Day 15)</b> | 3.500       | 2.679      | 1.306   | 0.191   | -1.751                 | 8.751  |
| <b>Group:Time</b>    | 5.170       | 3.882      | 1.332   | 1.183   | -2.439                 | 12.779 |
| <b>AST</b>           |             |            |         |         |                        |        |
| <i>Intercept</i>     | 26.991      | 2.343      | 11.522  |         | 22.400                 | 31.582 |
| <b>Group (CBD)</b>   | -7.531      | 3.395      | -2.218  | 0.027   | -14.184                | -0.878 |
| <b>Time (Day 15)</b> | -0.136      | 2.654      | -0.051  | 0.959   | -5.337                 | 5.064  |
| <b>Group:Time</b>    | 1.136       | 3.845      | 0.296   | 0.768   | -6.400                 | 8.673  |
| <b>GGT</b>           |             |            |         |         |                        |        |
| <i>Intercept</i>     | 0.855       | 0.353      | 2.419   |         | 0.162                  | 1.547  |
| <b>Group (CBD)</b>   | 0.264       | 0.500      | 0.528   | 0.598   | -0.715                 | 1.243  |
| <b>Time (Day 15)</b> | 0.682       | 0.500      | 1.365   | 0.172   | -0.297                 | 1.661  |
| <b>Group:Time</b>    | -0.173      | 0.707      | -0.244  | 0.807   | -1.557                 | 1.212  |
| <b>Urea</b>          |             |            |         |         |                        |        |
| <i>Intercept</i>     | 55.527      | 4.387      | 12.658  |         | 46.930                 | 64.125 |
| <b>Group (CBD)</b>   | -3.577      | 6.357      | -0.563  | 0.574   | -16.036                | 8.882  |
| <b>Time (Day 15)</b> | 1.064       | 3.208      | 0.332   | 0.740   | -5.223                 | 7.350  |
| <b>Group:Time</b>    | 1.716       | 4.648      | 0.369   | 0.712   | -7.393                 | 10.826 |
| <b>Creatinine</b>    |             |            |         |         |                        |        |
| <i>Intercept</i>     | 1.363       | 0.114      | 11.905  |         | 1.138                  | 1.587  |
| <b>Group (CBD)</b>   | -0.185      | 0.162      | -1.146  | 0.252   | -0.503                 | 0.132  |
| <b>Time (Day 15)</b> | 0.050       | 0.062      | 0.809   | 0.418   | -0.071                 | 0.171  |
| <b>Group:Time</b>    | 0.086       | 0.087      | 0.988   | 0.323   | -0.085                 | 0.258  |

**Supplementary Table S4 - Statistical analysis of the SDAI.**

| GLMM                 | Coefficient | Std. Error | t value | p value | 95% CI for coefficient |        |
|----------------------|-------------|------------|---------|---------|------------------------|--------|
| Fixed effects        |             |            |         |         | 2.5%                   | 97.5%  |
| <i>Intercept</i>     | 20.455      | 1.269      | 16.114  |         | 17.967                 | 22.942 |
| <b>Group (CBD)</b>   | -1.978      | 1.795      | -1.102  | 0.270   | -5.497                 | 1.540  |
| <b>Time (Day 15)</b> | -1.205      | 0.544      | -2.215  | 0.003   | -2.270                 | -0.139 |
| <b>Group:Time</b>    | -2.590      | 0.769      | -3.368  | < 0.001 | -4.097                 | -1.083 |

**Supplementary Table S5 - Statistical analysis of the COPS-C/F.**

| GLMM                 | Coefficient | Std. Error | t value | p value | 95% CI for coefficient |        |
|----------------------|-------------|------------|---------|---------|------------------------|--------|
| Fixed effects        |             |            |         |         | 2.5%                   | 97.5%  |
| <i>Intercept</i>     | 17.727      | 1.492      | 11.886  |         | 14.804                 | 20.650 |
| <b>Group (CBD)</b>   | -0.546      | 2.109      | -0.259  | 0.796   | -4.679                 | 3.589  |
| <b>Time (Day 15)</b> | -6.818      | 1.215      | -5.610  | < 0.001 | -9.200                 | -4.436 |
| <b>Group:Time</b>    | -2.909      | 1.719      | -1.692  | 0.091   | -6.278                 | 0.460  |

**Supplementary Table S6 – SDAI and COPS-C/F score obtained for every individual of each group, and the treatment response rate at day 15.**

| SDAI     |       |        |                   |         |        |                   |
|----------|-------|--------|-------------------|---------|--------|-------------------|
| Group    | CBD   |        |                   | Placebo |        |                   |
| Animal   | Day 0 | Day 15 | Response Rate (%) | Day 0   | Day 15 | Response Rate (%) |
| 1        | 24.25 | 21.5   | 11.34             | 20.00   | 19.75  | 1.25              |
| 2        | 14.24 | 6.00   | 57.86             | 15.50   | 10.25  | 33.87             |
| 3        | 16.50 | 9.25   | 43.94             | 21.00   | 18.75  | 10.71             |
| 4        | 12.25 | 10.00  | 18.37             | 11.00   | 14.25  | (-)29.54          |
| 5        | 16.00 | 9.75   | 39.06             | 24.50   | 23.25  | 5.10              |
| 6        | 19.75 | 20.75  | (-)5.06           | 23.00   | 18.75  | 18.48             |
| 7        | 23.25 | 18.00  | 22.58             | 20.00   | 20.25  | (-)1.25           |
| 8        | 15.5  | 11.00  | 29.03             | 21.75   | 22.75  | (-)4.60           |
| 9        | 19.25 | 17.25  | 10.39             | 22.00   | 22.50  | (-)2.27           |
| 10       | 22.00 | 18.25  | 17.05             | 27.00   | 24.75  | 8.33              |
| 11       | 20.25 | 19.75  | 2.47              | 19.25   | 16.5   | 14.29             |
| COPS-C/F |       |        |                   |         |        |                   |
| Group    | CBD   |        |                   | Placebo |        |                   |
| Animal   | Day 0 | Day 15 | Response Rate (%) | Day 0   | Day 15 | Response Rate (%) |
| 1        | 23    | 17     | 26.09             | 13      | 5      | 61.54             |
| 2        | 11    | 3      | 72.72             | 13      | 4      | 69.23             |
| 3        | 18    | 6      | 66.67             | 17      | 6      | 64.71             |
| 4        | 15    | 3      | 80.00             | 16      | 16     | 0                 |
| 5        | 15    | 10     | 33.33             | 17      | 18     | (-)5.88           |
| 6        | 12    | 12     | 0                 | 20      | 18     | 10.00             |
| 7        | 34    | 9      | 73.53             | 13      | 5      | 61.54             |
| 8        | 12    | 3      | 75.00             | 17      | 8      | 52.94             |
| 9        | 17    | 5      | 70.59             | 28      | 14     | 50.00             |
| 10       | 17    | 4      | 76.47             | 29      | 15     | 48.28             |
| 11       | 15    | 10     | 33.33             | 12      | 11     | 8.33              |

**Supplementary Table S7** – CBD descriptive values for oral administration per kg and serum concentrations for all individuals at the different assessment time points (At 4, 8, and 12h after administration).

| Animal | Dosage (mg/Kg) | Time (Hours) | CBD Mean concentration<br>(ng mL <sup>-1</sup> ) | Standard deviation |
|--------|----------------|--------------|--------------------------------------------------|--------------------|
| 1      | 0.87           | 4            | 6.74                                             | 0.04               |
|        |                | 8            | 5.52                                             | 0.44               |
|        |                | 12           | 1.92                                             | 0.14               |
| 2      | 1.00           | 4            | 1.76                                             | 0.08               |
|        |                | 8            | 1.15                                             | 0.04               |
|        |                | 12           | 1.01                                             | 0.04               |
| 3      | 1.65           | 4            | 10.47                                            | 0.61               |
|        |                | 8            | 34.81                                            | 4.01               |
|        |                | 12           | 10.00                                            | 0.59               |
| 4      | 1.02           | 4            | 12.86                                            | 0.80               |
|        |                | 8            | 4.47                                             | 0.37               |
|        |                | 12           | 1.60                                             | 0.10               |
| 5      | 0.69           | 4            | 2.75                                             | 0.08               |
|        |                | 8            | 0.57                                             | 0.06               |
|        |                | 12           | 0.74                                             | 0.05               |
| 6      | 0.84           | 4            | 12.10                                            | 0.52               |
|        |                | 8            | 1.47                                             | 0.10               |
|        |                | 12           | 0.80                                             | 0.06               |
| 7      | 1.03           | 4            | 1.61                                             | 0.07               |
|        |                | 8            | 1.20                                             | 0.12               |
|        |                | 12           | 2.40                                             | 0.16               |
| 8      | 1.18           | 4            | 1.20                                             | 0.03               |
|        |                | 8            | 0.23                                             | 0.01               |
|        |                | 12           | 0.22                                             | 0.02               |
| 9      | 1.00           | 4            | 4.28                                             | 0.02               |
|        |                | 8            | 2.33                                             | 0.26               |
|        |                | 12           | 3.47                                             | 0.16               |
| 10     | 0.83           | 4            | 6.69                                             | 0.08               |
|        |                | 8            | 4.49                                             | 0.16               |
|        |                | 12           | 0.96                                             | 0.00               |
| 11     | 0.82           | 4            | 0.11                                             | 0.01               |
|        |                | 8            | 0.35                                             | 0.03               |
|        |                | 12           | 0.50                                             | 0.00               |
