# Supplementary material for: Placebo-Controlled Trial of Daily Oral Cannabidiol as Adjunctive Treatment for Cats with Chronic Gingivostomatitis
Source: MDPI journal article supplement (doi:10.3390/ani13172716), 2023-08-26
Supplement: s1 [file s1]

## Composite oral pain scale-canine/feline (COPS-C/F)

### Owner Specific Questionnaire

| 1st Evaluation                                                                                                                      | Follow-up |
|-------------------------------------------------------------------------------------------------------------------------------------|-----------|
| <b>What type of food do you give to your pet?</b>                                                                                   |           |
| Dry                                                                                                                                 |           |
| Wet                                                                                                                                 |           |
| Mixed                                                                                                                               |           |
| <b>Q1. Considering the food that you give and compared with the past, your pet:</b>                                                 |           |
| 0 Eats normally                                                                                                                     |           |
| 1 Eats more slowly                                                                                                                  |           |
| 2 Eats less                                                                                                                         |           |
| 3 Has some unusual behaviors (e.g., retracts/complains while chewing; drops the bite while chewing, other)                          |           |
| 4 Does not eat at all                                                                                                               |           |
| <b>Q2. Have you noticed any change in your pet's feeding behavior compared with the past?</b>                                       |           |
| 0 No change                                                                                                                         |           |
| 1 Shows interest in food but after a few bites goes away from it                                                                    |           |
| 2 Shows less interest in food                                                                                                       |           |
| 3 It is uninterested in food                                                                                                        |           |
| <b>Q3. Have you noticed any change in your pet's willingness to interact/play with people or other pets compared with the past?</b> |           |
| <b>0 No change</b>                                                                                                                  |           |
| 1 Less active than usual, but still willing to interact/play                                                                        |           |
| 2 Depressed, less willing to interact/play                                                                                          |           |
| 3 Nervous, anxious, sometimes aggressive toward people/other pets                                                                   |           |
| 4 No longer interacts with people/other pets; tends to hide or to lay in its kennel                                                 |           |
| <b>Q4. Have you noticed any change in your pet's personal hygiene (grooming, licking) compared with the past?</b>                   |           |
| 0 No change                                                                                                                         |           |
| 1 Spends less time cleaning itself                                                                                                  |           |
| 2 Does not clean itself (it is dirty; the fur is disheveled)                                                                        |           |
| <b>Q5. Have you noticed any change in your pet's physical activity/mobility (running, walking, etc.) compared with the past?</b>    |           |
| 0 No change                                                                                                                         |           |
| 1 Less willing to do physical activity                                                                                              |           |
| 2 Refuses to do any physical activity                                                                                               |           |
| <b>Q6. Have you noticed the presence of one or more of the following behaviors?</b>                                                 |           |
| 1 Moans/groans                                                                                                                      |           |
| 1 Increased aggressiveness and/or nervousness                                                                                       |           |
| 1 Avoids being touched around nose/mouth                                                                                            |           |
| 1 Has less interest in playing involving the use of mouth (wooden sticks, toys, etc.)                                               |           |
| 1 Often scratches the mouth area                                                                                                    |           |
| 1 Has difficulties in yawning and/or opening the mouth                                                                              |           |
| 1 Produces more saliva and/or swallows more frequently                                                                              |           |
| 1 Bad breath                                                                                                                        |           |
| 1 Grinds its teeth                                                                                                                  |           |
| 1 Chewing without food in its mouth                                                                                                 |           |

## Veterinary Specific Questionnaire

| 1st Evaluation                                                                    | Follow-up |
|-----------------------------------------------------------------------------------|-----------|
| <b>Q1. The animal is:</b>                                                         |           |
| 0 Lively, happy                                                                   |           |
| 1 Quiet                                                                           |           |
| 2 Indifferent to its surroundings                                                 |           |
| 3 Nervous, anxious, scared                                                        |           |
| 4 Depressed, unresponsive to stimuli                                              |           |
| <b>Q2. When manipulating the oral cavity, the animal is:</b>                      |           |
| 0 Calm, relaxed                                                                   |           |
| 1 Looks around                                                                    |           |
| 2 Tries to avoid manipulations                                                    |           |
| 3 Complains                                                                       |           |
| 4 Growls/hisses and/or attempts to bite/scratch                                   |           |
| <b>Q3. During the visit, did you observe any of the following?</b>                |           |
| 1 Ptyalism                                                                        |           |
| 1 Nasal discharge                                                                 |           |
| 1 Resistance/difficulty in opening the mouth                                      |           |
| 1 Crackles when manipulating the temporomandibular joint                          |           |
| 1 Atrophy of masseter/temporalis muscles                                          |           |
| 1 Swelling of masseter/temporalis muscles                                         |           |
| 1 Mouth swelling or asymmetry                                                     |           |
| 1 Sensitivity and/or increase in resistance to the eye pressure                   |           |
| <b>Q4. While examining the oral cavity, did you observe any of the following?</b> |           |
| 1 Accumulation of food in the oral cavity                                         |           |
| 1 Halitosis                                                                       |           |
| 1 Spontaneous/provoked gums bleeding                                              |           |
| 1 Dental fractures                                                                |           |
| 1 Dental malformations                                                            |           |
| 1 Tooth discoloration                                                             |           |
| 1 Tooth mobility                                                                  |           |
| 1 Enamel hypocalcification or hypoplasia                                          |           |
| 1 Hyperplasia of the gums or presence of gum tumors                               |           |
| 1 Ulcerative lesions of the oral mucosa/tongue/palate/gums                        |           |
| 1 Maxillary or peri-zygomatic fistulas                                            |           |
| 1 Gum or mucosae fistulas                                                         |           |
