# Supplementary material for: Placebo-Controlled Trial of Daily Oral Cannabidiol as Adjunctive Treatment for Cats with Chronic Gingivostomatitis
Source: Animals (Basel). 2023 Aug 26;13(17):2716. doi: 10.3390/ani13172716 (PMC10487179; doi:10.3390/ani13172716)
Supplement: Supplementary file 1 [file animals-13-02716-s001.zip]

Archive with 4 entries (4 files):
- Supplementary file S1.pdf
- Supplementary file S2.pdf
- Supplementary file S3.pdf
- Supplementary tables.pdf
